# Supplementary material
Source: HighWire-hosted journal article supplement (https://ebmtp.com/highwire/filestream/136125/field_highwire_adjunct_files/0/Chen_85_1980.pdf)
Supplement: Chen_85_1980.pdf [file Chen_85_1980.pdf]

# 急性缺血性卒中管理：血管内治疗 vs. 药物治疗

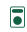

Ching-Jen Chen, MD  
Dale Ding, MD  
Robert M. Starke, MD,  
MSc  
Prachi Mehndiratta, MD  
R. Webster Crowley, MD  
Kenneth C. Liu, MD  
Andrew M. Southerland,  
MD, MSc  
Bradford B. Worrall, MD,  
MSc

Correspondence to  
Dr. Chen:  
chenjared@gmail.com

## 摘要

**目的：**对近期随机对照试验（randomized controlled trials, RCT）中的急性缺血性卒中血管内治疗与药物治疗的预后进行比较。

**方法：**采用系统性评价方法，并纳入 2013 年 1 月 1 日~2015 年 5 月 1 日发表的直接比较急性缺血性卒中患者血管内治疗与药物治疗的多中心、前瞻性 RCT 研究。对血管内治疗和药物治疗的改良 Rankin 评分（modified Rankin Scale, mRS）、90 天死亡率和症状性颅内出血（symptomatic intracranial hemorrhage, sICH）进行 meta 分析。

**结果：**共纳入 8 项多中心、前瞻性研究 [卒中介入治疗(Interventional Management of Stroke, IMS)III 试验、急性缺血性卒中的局部 vs. 全身溶栓治疗(Local Versus Systemic Thrombolysis for Acute Ischemic Stroke, SYNTHESIS) EXPANSION 试验、采用栓子切除术机械性取栓并再通卒中斑块(Mechanical Retrieval and Recanalization of Stroke Clots Using Embolectomy, MR RESCUE) 试验、荷兰血管内治疗急性缺血性卒中的多中心随机临床试验(Multicenter Randomized Clinical Trial of Endovascular Treatment for Acute Ischemic Stroke in the Netherlands, MR CLEAN)、充血性心力衰竭及肺动脉导管插入术疗效的评估研究(Evaluation Study of Congestive Heart Failure and Pulmonary Artery Catheterization Effectiveness, ESCAPE)、延长急性神经功能缺损至动脉内溶栓时间(Extending the Time for Thrombolysis in Emergency Neurological Deficits—Intra-Arterial, EXTEND-IA) 试验、Solitaire 支架血栓切除术作为主要的血管内治疗手段(Solitaire With the Intention For Thrombectomy as Primary Endovascular Treatment, SWIFT PRIME) 试验和前循环卒中 8 小时内采用 Solitaire 装置行血管内血运重建 vs. 最佳药物治疗(Endovascular Revascularization With Solitaire Device Versus Best Medical Therapy in Anterior Circulation Stroke Within 8 Hours, REVASCAT) 试验] 及 2,423 例患者。汇总数据的 meta 分析证实 90 天的功能独立性评分(mRS 0~2 分)支持血管内治疗[比值比(OR)=1.71;  $p=0.005$ ]。对 6 项有大血管闭塞(large vessel occlusion, LVO) 标准的研究进行亚组分析亦证实 90 天的功能独立性评分支持血管内治疗(OR=2.23;  $p<0.00001$ )。对介入臂中主要使用支架回收装置的 5 项研究进行亚组分析仍表明 90 天的功能独立性评分支持血管内治疗(OR=2.29;  $p<0.00001$ )。所有分析及亚组分析中，血管内治疗与药物治疗间的 90 天死亡率和 sICH 无差异。

**结论：**本项 meta 分析为血管内介入治疗联合药物治疗(包括合适的患者静脉注射组织纤溶酶原激活物)提供了强有力的证据,改善经适当筛选的因 LVO 引起的急性缺血性卒中患者的预后。 *Neurology*® 2015;85:1980-1990

## 术语

**AIS** = 急性缺血性卒中; **ASPECTS** = Alberta 卒中项目早期 CT 评分; **CI** = 可信区间; **ESCAPE** = 充血性心力衰竭及肺动脉导管插入术疗效的评估研究; **EXTEND-IA** = 延长急性神经功能缺损至动脉内溶栓时间; **IA** = 动脉内; **ICA** = 颈内动脉内; **IMS III** = 卒中介入治疗 III; **ITT** = 意向性治疗; **LVO** = 大血管闭塞; **MR CLEAN** = 荷兰血管内治疗急性缺血性卒中的多中心随机临床试验; **MR RESCUE** = 采用栓子切除术机械性取栓并再通卒中斑块; **mRS** = 改良的 Rankin 量表; **NIHSS** = 美国国立卫生研究院卒中评分; **OR** = 比值比; **RCT** = 随机对照试验; **REVASCAT** = 前循环卒中 8 小时内采用 Solitaire 装置行血管内血运重建 vs. 最佳药物治疗; **sICH** = 有症状性颅内出血; **SWIFT PRIME** = Solitaire 支架血栓切除术作为主要的血管内治疗手段; **SYNTHESIS** = 急性缺血性卒中的局部 vs. 全身溶栓治疗; **tPA** = 组织纤溶酶原激活物; **TREVO 2** = Trevo 与 Merci 回收器用于治疗急性缺血性卒中中大血管闭塞的血栓切除术血运重建。

补充数据见  
*Neurology.org*

From the Departments of Neurological Surgery (C.-J.C., D.D., R.M.S., R.W.C., K.C.L.), Neurology (P.M., A.M.S., B.B.W.), and Public Health Sciences (A.M.S., B.B.W.), University of Virginia Health System, Charlottesville.

Go to *Neurology.org* for full disclosures. Funding information and disclosures deemed relevant by the authors, if any, are provided at the end of the article.

在美国，每年约有 795,000 例患者发生急性缺血性卒中 (Acute ischemic stroke, AIS)<sup>[1]</sup>。据估算约 1/3~1/2 的 AIS 有某一颅内大动脉的大血管闭塞 (large vessel occlusion, LVO) 表现，其中大脑中动脉或颈内动脉 (internal carotid artery, CIA) 最常见<sup>[2]</sup>。直到最近之前，在症状发生的 4.5 小时内静脉注射组织纤溶酶原激活物 (IV tissue plasminogen activator, IV-tPA) 还是治疗 AIS 的唯一经验证的有效手段<sup>[3,4]</sup>。然而，因 LVO 引起的 AIS 其经 IV-tPA 治疗后的血管再通率较低且临床预后不佳<sup>[5]</sup>。

IV-tPA 联合血管内治疗可能是治疗急性 LVO 患者的有效方案。然而，3 项关于血管内卒中治疗的随机对照试验 (randomized controlled trials, RCT) 以失败告终浇灭了人们对血管内介入的热情<sup>[6-8]</sup>。方法学缺陷一直是这些试验主要被批评的方面<sup>[9]</sup>。近期，有几项关于血管内卒中治疗的试验已克服初期研究的缺陷，并报道了 AIS 血管内治疗的卓越成果<sup>[10-14]</sup>。本项 meta 分析的目的是比较现代 RCT 中 AIS 患者血管内治疗和药物治疗的功能独立性率、致死率和症状性颅内出血率。我们假设汇总的数据中具有一致的安全性和有效性。

**方法 入组标准。** meta 分析的入组标准如下：(1) 必须是发表于 2013 年 1 月 1 日~2015 年 5 月 1 日的多中心、前瞻性、RCT；(2) 必须是直接比较 AIS 患者血管内治疗和药物治疗结果的研究。

**文献检索。** 2015 年 5 月 1 日在 PubMed 上进行系统性文献检索，通过检索词“卒中”查找 2013 年至今的文献。检索后，按照上述纳入标准根据题目和摘要对文章进行筛选。对保留下的文献进行进一步地详细综述以获得相关性及可用数据。

**文献回顾和数据提取。** 本研究无经注册的文献回顾方法可利用。因此，本文献回顾参照第四版系统综述和荟萃分析优先报告的条目 (Preferred Reporting Items for Systematic Reviews and Meta-Analyses, PRISMA) 声明。自纳入的研究中提取可用的研究、人口学特征、基线临床和影像学资料、介入措施及预后数据用以进一步分析。研究、人口学特征、基线临床和影像学资料包括试验周期、参与的中心数量、试验地点、患者数及试验入组标准 [如自卒中症状发作的时间、年龄、LVO、Alberta 卒中项目早期 CT 评分 (Alberta Stroke Program Early CT Score, ASPECTS) 以及美国国立卫生研究院卒中评分 (NIH Stroke Scale, NIHSS)]<sup>[15]</sup>。LVO 是指影像中颅内

血管近端有栓塞表现，可能是由于颈动脉疾病、心源性栓子或其他来源的血栓栓子而引起。治疗数据包括介入组和对照组可利用的治疗方式、意向性治疗 (intent-to-treat, ITT) 患者数、机械取栓患者数、IV/ 或动脉内 (intra-arterial, IA) -tPA、中位/平均 NIHSS 评分、中位/平均 ASPECTS 评分、中位/平均年龄、影像资料中的 LVO、行全身麻醉的患者数以及从症状发作到 IV-tPA 或腹股沟穿刺的中位/平均时间。预后数据包括成功的血管影像学再通 (定义为改良脑缺血溶栓血流分级为 2b 或 3 级)、介入后 90 天的改良 Rankin 量表 (modified Rankin Scale, mRS) 评分、sICH、神经功能恶化、恶性脑水肿及卒中复发。

**统计学分析。** 采用 SPSS20.0.0 版本 (IBM, Armonk, NY; 2011) 进行描述性统计，其中对比 mRS 评分和 sICH 时，则采用 5.2.8 版本的 Review Manager (Copenhagen: The Nordic Cochrane Centre, The Cochrane Collaboration, 2012) 对汇总数据进行统计学分析。采用 Mantel-Haenszel 检验计算入组研究的比值比 (Odds ratios, OR)。假设纳入的研究中存在潜在的临床多样性以及方法学差异，在分析时采用随机效应模型以说明单个研究中的抽样变异和随机变异。采用  $\chi^2$  检验和  $I^2$  检验统计学方法检测研究的异质性。当  $\chi^2$  值在显著差异在 10% 水平以内 ( $p < 0.1$ ) 同时  $I^2$  值  $> 50\%$  时，认为有显著的异质性。参照第四版 Cochrane 介入系统评价手册<sup>[16]</sup> 中的指南评估研究的偏倚风险。所有统计检验均为双侧， $p < 0.05$  认为有统计意义。

**结果 研究选择。** 经检索获得 8 项多中心、前瞻性 RCT 研究：卒中介入管理 (Interventional Management of Stroke, IMS) III 试验、急性缺血性卒中的局部 vs. 全身溶栓治疗 (Local Versus Systemic Thrombolysis for Acute Ischemic Stroke, SYNTHESIS) EXPANSION 试验、采用栓子切除术机械性取栓并再通卒中斑块 (Mechanical Retrieval and Recanalization of Stroke Clots Using Embolectomy, MR RESCUE) 试验、荷兰血管内治疗急性缺血性卒中的多中心随机临床 (Multicenter Randomized Clinical Trial of Endovascular Treatment for Acute Ischemic Stroke in the Netherlands, MR CLEAN) 试验、充血性心力衰竭及肺动脉导管插入术疗效的评估研究 (Evaluation Study of Congestive Heart Failure and Pulmonary Artery Catheterization Effectiveness, ESCAPE)、延长急性神经功能缺损至动脉内溶栓时间 (Extending the Time for Thrombolysis in Emergency Neurological Deficits-Intra-Arterial,

EXTEND-IA) 试验、Solitaire 支架血栓切除术作为主要的血管内治疗手段 (Solitaire With the Intention For Thrombectomy as Primary Endovascular Treatment, SWIFT PRIME) 试验和前循环卒中 8 小时内采用 Solitaire 装置行血管内血运重建 vs. 最佳药物治疗 (Endovascular Revascularization With Solitaire Device Versus Best Medical Therapy in Anterior Circulation Stroke Within 8 Hours, REVASCAT) 试验, 在 meta 分析中共纳入 2,423 例患者<sup>[6,8,10-14]</sup>。对所有研究进行偏倚风险评估, 提示所有研究均具有较低的选择偏倚风险、测量偏倚风险、失访偏倚风险和报告偏倚风险。然而, 由于在试验实施的过程中未对患者及治疗小组使用盲法, 因此这些研究都具有较高的实施偏倚风险。其他的偏倚包括 5 项研究提前终止 (REVASCAT、SWIFT PRIME、IMS III、EXTEND-IA、ESCAPE)、1 项研究中进行机械取栓的患者数有限 (SYNTHESIS EXPANSION) 以及 1 项研究中采用的影像学评估方案违规 (ESCAPE)<sup>[6,8,11-14]</sup>。

**人口学特征和研究特点。**表 1 总结了纳入研究的设计情况。本综述入组的 8 项多中心前瞻性 RCT 研究中, 有 3 项研究发表于 2013 年, 5 项发表于 2015 年。参与中心共计 195 个 (范围 4-58)。表 2 总结了各入组研究中介入臂和对照臂的特点。介入臂和对照臂的 ITT 患者分别有 1,313 例和 1,110 例。介入臂和对照臂中分别有 988 例 (75%) 和 989 例 (89%) 患者接受 IV-tPA 治疗。介入臂中有 569 例 (43%) 患者使用可回收支架行机械性取栓术, 有 498 例 (38%) 患者接受 IA-tPA。介入臂和对照臂中分别有 888 例 (78%) 和 799 例 (86%) 患者有 LVO 表现。介入臂中有 143 例 (30%) 患者行全身麻醉。

**根据 LVO 标准分层的介入治疗与药物治疗的预后及并发症。**表 3 详细显示了各入组研究介入臂和对照臂的 90 天 mRS 评分。介入臂中有 1,293 例患者进行了随访评估, 分别有 140 例 (11%)、216 例 (17%)、201 例 (16%)、225 例 (17%)、209 例 (16%)、84 例 (6%) 和 218 例 (17%) 患者的 90 天 mRS 评分为 0、1、2、3、4、5 和 6 分。对照臂中有 1,094 例患者的随访评估可用; 分别有 81 例 (7%)、130 例 (12%)、140 例 (13%)、181 例 (17%)、240 例 (22%)、121 例 (11%) 和 201 例 (18%) 患者的 90 天 mRS 评分为 0、1、2、3、4、5 和 6 分 (图 e-1 见于 *Neurology*® 网站: [Neurology.org](http://Neurology.org))。3 项研究中 2 臂间无明显差异, 而在另外 5 项研究中发现血管内治疗的预后显著优于药物

治疗。1,005 例患者中有 565 例 (56%) 达到血管造影术显示血管重建。与 2013 年的研究, 所有 2015 年发表的近期研究中血管内介入的再灌注成功率更高。

根据随机效应模型, 入组的 8 项研究汇总数据的 meta 分析 (图 1A) 证实 90 天的功能独立性评分 (mRS 评分 0-2 分) 支持血管内卒中介入 [OR 1.71; 95% 可信区间 (confidence interval, CI) 1.18-2.49;  $p = 0.005$ ]。在这一分析中入组的各研究间存在异质性 ( $\chi^2 = 28.47$ ;  $p = 0.0002$ ;  $I^2 = 75\%$ )。对 6 项仅纳入基线神经影像学提示有 LVO 证据 (LVO 标准) 的患者的研究进行亚组分析, 亦证实功能独立性结果支持血管内治疗 (OR 2.23; 95% CI 1.70-2.93;  $p < 0.00001$ )。而对 2 项无 LVO 标准的研究进行亚组分析显示, 2 臂间的功能独立性无差异 (OR 0.99; 95% CI 0.76-1.30;  $p = 0.94$ )。亚组间存在异质性 ( $\chi^2 = 17.46$ ;  $p < 0.0001$ ;  $I^2 = 94.3\%$ )。

根据随机效应模型, 入组的 8 项研究汇总数据的 meta 分析 (图 1B) 证实 90 天死亡率无差异 (OR 0.87; 95% CI 0.67-1.12;  $p = 0.27$ )。对 6 项有 LVO 标准的研究进行亚组分析亦证实 2 臂间的死亡率无差异 (OR 0.79; 95% CI 0.59-1.05;  $p = 0.11$ )。对 2 项无 LVO 标准的研究进行亚组分析, 亦显示死亡率无差异 (OR 1.08; 95% CI 0.63-1.86;  $p = 0.77$ )。亚组间无异质性 ( $\chi^2 = 1.04$ ;  $p = 0.31$ ;  $I^2 = 4.0\%$ )。

根据随机效应模型, 入组的 8 项研究汇总数据的 meta 分析 (图 1C) 显示 2 臂间 sICH 无差异 (OR 1.12; 95% CI 0.77-1.63;  $p = 0.56$ )。对 6 项有 LVO 标准的研究 (OR 1.20; 95% CI 0.71-2.03;  $p = 0.50$ ) 及 2 项无 LVO 标准的研究 (OR 1.04; 95% CI 0.60-1.80;  $p = 0.88$ ) 分别进行亚组分析, 均显示 2 臂间无差异。亚组间不存在异质性 ( $\chi^2 = 0.13$ ;  $p = 0.72$ ;  $I^2 = 0\%$ )。

**根据使用支架回收装置分层的介入与药物治疗的预后及并发症。**对介入臂主要使用 ( $\geq 70\%$ ) 支架可回收装置的 5 项研究进行亚组分析 (图 2A), 证实 90 天的功能独立性支持血管内治疗 (OR 2.39; 95% CI 1.88-3.04;  $p < 0.00001$ )。对 3 项未主要使用支架回收装置的研究进行亚组分析发现 2 臂间的功能独立性评分无差异 (OR 0.98; 95% CI 0.77-1.26;  $p = 0.90$ )。亚组间存在异质性 ( $\chi^2 = 25.11$ ;  $p < 0.00001$ ;  $I^2 = 96.0\%$ )。

在对 5 项主要使用支架回收器的研究 (OR 0.77; 95% CI 0.54-1.14;  $p = 0.17$ ) 和 3 项非主要使用支架回收器的研究 (OR 0.99; 95% CI 0.67-1.46;  $p = 0.95$ ) 的亚组分析中未发现 2 臂间的 90 天死亡率存在差异。亚组间未发现有异质性 ( $\chi^2 = 0.80$ ;  $p = 0.37$ ;  $I^2 = 0\%$ )。

在对 5 项主要使用支架回收器的研究 (OR 1.17;

表1 纳入 meta 分析的随机对照试验

| 入选标准                |      |           |              |     |     |               |                    |                      |                                                           |                               |                          |        |              |
|---------------------|------|-----------|--------------|-----|-----|---------------|--------------------|----------------------|-----------------------------------------------------------|-------------------------------|--------------------------|--------|--------------|
| 试验                  | 发表年份 | 研究周期      | 位置           | 中心数 | 患者数 | 症状发作至血管内治疗的时间 | 年龄, 岁              | NIHSS 评分             | LVO                                                       | ASPECTS                       | 介入臂                      | 对照臂    | 主要终点         |
| IMS III             | 2013 | 2006-2012 | 北美, 欧洲, 澳大利亚 | 58  | 656 | ≤ 5           | ≥ 18 <sup>a</sup>  | ≥10, or ≥8 with LOVb | NA <sup>a</sup>                                           | NA <sup>c</sup>               | IA 血栓切除术, IA-tPA, IV-tPA | IV-tPA | 90天的mRS ≤ 2  |
| SYNTHESIS Expansion | 2013 | 2008-2012 | 意大利          | 24  | 362 | ≤ 6           | 18-80              | NA                   | NA                                                        | NA                            | IA 血栓切除术, IA-tPA, IV-tPA | IV-tPA | 90天的mRS ≤ 1  |
| MR RESCUE           | 2013 | 2004-2011 | 北美           | 22  | 118 | ≤ 8           | 18-85              | 6-29                 | ICA或MCA (M1或M2) 闭塞                                        | NA                            | IA 血栓切除术, IA-tPA, IV-tPA | IV-tPA | 90天的mRS      |
| MR CLEAN            | 2015 | 2010-2014 | 荷兰           | 16  | 500 | ≤ 6           | ≥ 18               | ≥ 2                  | ICA远端、MCA (M1或M2) 或ACA (A1或A2) 闭塞                         | NA                            | IA 血栓切除术, IA-tPA, IV-tPA | IV-tPA | 90天的mRS      |
| EXTEND-IA           | 2015 | 2012-2014 | 澳大利亚, 新西兰    | 10  | 70  | ≤ 6           | NA                 | NA                   | ICA或MCA (M1或M2) 闭塞                                        | NA <sup>d</sup>               | IA 血栓切除术, IA-tPA, IV-tPA | IV-tPA | 再灌注+早期神经功能改善 |
| ESCAPE              | 2015 | 2013-2014 | 北美, 亚洲, 欧洲   | 22  | 315 | ≤ 12          | ≥ 18               | NA                   | MCA闭塞及其中间分支伴或不伴ICA颅内段闭塞及CTA显示≥50% MCA软脑膜动脉循环 <sup>e</sup> | CT ≥ 6 <sup>f</sup>           | IA 血栓切除术, IV-tPA         | IV-tPA | 90天的mRS      |
| SWIFT PRIME         | 2015 | 2012-2014 | 美国, 欧洲       | 39  | 196 | ≤ 6           | 18-80              | 8-29                 | 颅内ICA、MCA (M1) 或颈动脉终端闭塞                                   | CT或MRI ≥ 6                    | IA 血栓切除术, IV-tPA         | IV-tPA | 90天的mRS      |
| REVASCAT            | 2015 | 2012-2014 | 西班牙          | 4   | 206 | ≤ 8           | 18-85 <sup>h</sup> | ≥ 2                  | 颅内ICA、MCA (M1) 或ICA/MCA (M1) 近端交界处闭塞                      | CT ≥ 7, 或MRI ≥ 6 <sup>h</sup> | IA 血栓切除术, IV-tPA         | IV-tPA | 90天的mRS      |

缩略语: ACA = 大脑前动脉; ASPECTS = Alberta卒中项目早期CT评分; CTA = CT血管成像; ESCAPE = 充血性心力衰竭及肺动脉导管插入术疗效的评估研究; EXTEND-IA = 延长急性神经功能缺损至动脉内溶栓时间; IA = 动脉内; ICA = 颈内动脉; IMS III = 卒中介入治疗 III; LVO = 大血管闭塞; MCA = 大脑中动脉; MR CLEAN = 荷兰血管内治疗急性缺血性卒中中的多中心随机临床试验; MR RESCUE = 采用栓子切除术机械性取栓并再通卒中斑块; mRS = 改良Rankin评分; NA = 未知; NIHSS = NIH卒中评分; REVASCAT = 前循环卒中8小时内采用Solitaire装置行血管内血运重建vs. 最佳药物治疗; SWIFT PRIME = Solitaire支架血栓切除术作为主要的血管内治疗手段;

SYNTHESIS = 急性缺血性卒中中的局部vs. 全身溶栓治疗; tPA = 组织纤溶酶原激活剂。

<sup>a</sup>在284名患者进行随机入组后, 方案由18岁-80岁变更为无排除年龄上限。

<sup>b</sup>在284名患者进行随机入组后, 入组方式变更为允许经CTA识别 (ICA、MCA-M1或基底动脉梗塞) 的NIHSS评分在8分或9分的患者入组。

<sup>c</sup>ASPECTS评分<4分用于指导>1/3区域受累的患者评估, 但不作为排除标准。

<sup>d</sup>CT或MRI下T<sub>max</sub> > 6秒延迟灌注体积, 或CT区域血流或弥散加权成像梗死核心体积错配率 > 1.2, 绝对错配体积 > 10 mL, 梗死核心体积 < 70 mL。

<sup>e</sup>初次成像与24小时成像间灌注损伤体积减小百分比, NIHSS评分下降≥ 8分, 或3天NIHSS评分为0或1分。

<sup>f</sup>15例患者中有14例有不适的血管梗塞, 20例侧支循环较差。

<sup>g</sup>308例患者中有11例ASPECT评分 < 6分。

<sup>h</sup>入组160人后, 纳入标准右80岁增加至85岁且ASPECTS评分 > 8分。

表2 纳入的随机对照试验中介入臂与对照臂的特点

| 试验                  | 介入臂      |              |               |               |               |                  |            |                       |           |                       | 对照臂      |               |                |                  |            |                      |                     |  |  |  |
|---------------------|----------|--------------|---------------|---------------|---------------|------------------|------------|-----------------------|-----------|-----------------------|----------|---------------|----------------|------------------|------------|----------------------|---------------------|--|--|--|
|                     | ITT患者, n | 可回收支架, n (%) | IV-tPA, n (%) | IV-tPA, n (%) | 平均/中位 NIHSS评分 | 平均/中位 ASPECTS 评分 | 平均/中位年龄, 岁 | LVO, n (%)            | GA, n (%) | 平均/中位症状发生到肌腱穿刺时间, min | ITT患者, n | IV-tPA, n (%) | 平均/中位 NIHSS 评分 | 平均/中位 ASPECTS 评分 | 平均/中位年龄, 岁 | LVO, n (%)           | 至IPA治疗的平均/中位时间, min |  |  |  |
| IMS III             | 434      | 14 (3)       | 266 (61)      | 434 (100)     | 17            | NA               | 69         | 190 (44) <sup>a</sup> | NR        | 208                   | 222      | 222 (100)     | 16             | NA               | 68         | 92 (41) <sup>b</sup> | 121.2               |  |  |  |
| SYNTHESIS Expansion | 181      | 23(13)       | 165 (91)      | 0(0)          | 13            | NA               | 66         | NR                    | NR        | 225                   | 181      | 178 (98)      | 13             | NA               | 67         | NR                   | 165                 |  |  |  |
| MR RESCUE           | 64       | 0(0)         | 8(13)         | 28 (44)       | 17.4          | NA               | 64.2       | 64 (100)              | NR        | 381                   | 54       | 16 (30)       | 17.7           | NA               | 67.1       | 54 (100)             | NR                  |  |  |  |
| MR CLEAN            | 233      | 190(82)      | 24 (10)       | 203 (87)      | 17            | 9                | 65.8       | 233 (100)             | 88 (38)   | 260                   | 267      | 242 (91)      | 18             | 9                | 65.7       | 267 (100)            | 87                  |  |  |  |
| EXTEND-IA           | 35       | 27(77)       | 35 (100)      | 35 (100)      | 17            | NA               | 68.6       | 35 (100)              | 12 (34)   | 210                   | 35       | 35 (100)      | 13             | NA               | 70.2       | 35 (100)             | 127                 |  |  |  |
| ESCAPE              | 165      | 130(79)      | 0(0)          | 120 (73)      | 16            | 9                | 71         | 165 (100)             | NR        | 241 <sup>b</sup>      | 150      | 118 (79)      | 17             | 9                | 70         | 150 (100)            | 125                 |  |  |  |
| SWIFT PRIME         | 98       | 87(89)       | 0(0)          | 98 (100)      | 17            | 9                | 65         | 98 (100)              | 36 (37)   | 224                   | 98       | 98 (100)      | 17             | 9                | 66.3       | 98 (100)             | 117                 |  |  |  |
| REVASCAT            | 103      | 98(95)       | 0(0)          | 70 (68)       | 17            | 7                | 65.7       | 103 (100)             | 7 (7)     | 269                   | 103      | 80 (78)       | 17             | 8                | 67.2       | 103 (100)            | 105                 |  |  |  |
| 总计                  | 1,313    | 569(43)      | 498 (38)      | 988 (75)      |               |                  |            | 888 (78)              | 143 (30)  |                       | 1,110    | 989 (89)      |                |                  | 799 (86)   |                      |                     |  |  |  |

缩略语: ASPECTS=Alberta 卒中项目早期 CT 评分; ESCAPE = 充血型心力衰竭及肺动脉导管插入术疗效的评估研究; EXTEND-IA = 延长急性神经功能缺损至动脉内溶栓时间; GA = 全身麻醉; IA = 动脉内; IMS III = 卒中介入治疗 III; ITT = 意向性治疗; LVO = 大血管闭塞; MR CLEAN = 荷兰血管内治疗急性缺血性卒中中的多中心随机临床试验; MR RESCUE = 采用栓子切除术机械性取栓并再通卒中斑块; NA = 未知; NIHSS=NIH 卒中评分; 溶栓治疗; tPA = 组织纤溶酶原激活物。

<sup>a</sup> 在 284 名患者进行随机入组后, 入组方式变更为允许经 CTA 识别的 NIHSS 评分在 8 分或 9 分的患者入组。

<sup>b</sup> 症状发作至首次再灌注。

表 3 随机对照试验结果

| 试验                  | 介入臂: 90天mRS评分 |          |          |          |          |        |          |             |        |          | 对照臂: 90天mRS评分 |          |          |          |          |             |                                                                                       |  |  |  | 血管内治疗成功再灌注, n/n (%) <sup>a</sup> |
|---------------------|---------------|----------|----------|----------|----------|--------|----------|-------------|--------|----------|---------------|----------|----------|----------|----------|-------------|---------------------------------------------------------------------------------------|--|--|--|----------------------------------|
|                     | 0             | 1        | 2        | 3        | 4        | 5      | 6        | 总计, n       | 0      | 1        | 2             | 3        | 4        | 5        | 6        | 总计, n       | 主要终点事件结果                                                                              |  |  |  |                                  |
| IMS III             | 53            | 69       | 55       | 71       | 64       | 20     | 83       | 415         | 19     | 39       | 28            | 35       | 30       | 15       | 48       | 214         | 无差异, 绝对校正差异1.5 (-6.1~9.1)                                                             |  |  |  |                                  |
| SYNTHESIS Expansion | 22            | 33       | 21       | 37       | 32       | 10     | 26       | 181         | 28     | 35       | 21            | 28       | 38       | 13       | 18       | 181         | 无差异, OR 0.71 (0.44~1.14, p = 0.16)                                                    |  |  |  |                                  |
| MR RESCUE           | 2             | 7        | 3        | 10       | 15       | 15     | 12       | 64          | 3      | 4        | 4             | 12       | 12       | 6        | 13       | 54          | 无差异 (p = 0.99)                                                                        |  |  |  |                                  |
| MR CLEAN            | 6             | 21       | 49       | 43       | 52       | 13     | 49       | 233         | 0      | 16       | 35            | 44       | 81       | 32       | 59       | 267         | 血管内治疗更优, OR 1.67 (1.21~2.30)                                                          |  |  |  |                                  |
| EXTEND-IA           | 9             | 9        | 7        | 6        | 1        | 0      | 3        | 35          | 6      | 4        | 4             | 4        | 6        | 4        | 7        | 35          | 血管内治疗更优: 缺血区域再灌注, 效应量 4.7 (2.9~9.0, p < 0.001); 早期神经功能改善效应量 6.0 (2.0~18.0, p = 0.002) |  |  |  |                                  |
| ESCAPE              | 24            | 34       | 29       | 27       | 22       | 11     | 17       | 164         | 11     | 15       | 17            | 22       | 36       | 18       | 28       | 147         | 血管内治疗更优, OR 3.1 (2.0~4.7, p < 0.001)                                                  |  |  |  |                                  |
| SWIFT PRIME         | 17            | 25       | 17       | 12       | 15       | 3      | 9        | 98          | 8      | 10       | 15            | 16       | 20       | 12       | 12       | 93          | 血管内治疗更优 (p < 0.001)                                                                   |  |  |  |                                  |
| REVASCAT            | 7             | 18       | 20       | 19       | 8        | 12     | 19       | 103         | 6      | 7        | 16            | 20       | 17       | 21       | 16       | 103         | 血管内治疗更优, OR 1.7 (1.05 ~ 2.8)                                                          |  |  |  |                                  |
| 总计, n (%)           | 140 (11)      | 216 (17) | 201 (16) | 225 (17) | 209 (16) | 84 (6) | 218 (17) | 1,293 (100) | 81 (7) | 130 (12) | 140 (13)      | 181 (17) | 240 (22) | 121 (11) | 201 (18) | 1,094 (100) | -                                                                                     |  |  |  |                                  |

缩略语: ESCAPE = 充血性心力衰竭及肺动脉导管插入术疗效的评估研究; EXTEND-IA = 延长急性缺血性卒中患者接受机械取栓至动脉内溶栓时间; IMS III = 卒中介入治疗III; MR CLEAN = 荷兰血管内治疗急性缺血性卒中中的多中心随机临床试验; MR RESCUE = 采用经子切除机械性取栓并再通卒中斑块; mRS = 改良Rankin评分; NR = 未报告; OR = 比值比; REVASCAT = 循环卒中8小时内采用Solitaire装置行血管内血运重建vs.最佳药物治疗; SWIFT PRIME = Solitaire 支架血栓切除术作为主要的血管内治疗手段; SYNTHESIS = 急性缺血性卒中的局部vs.全身溶栓治疗。  
<sup>a</sup>改良脑梗死溶栓评分为2b+3。

95% CI 0.63~2.18;  $p = 0.61$ ) 和 3 项非主要使用支架回收器的研究 (OR 1.06; 95% CI 0.63~1.78;  $p = 0.83$ ) 的亚组分析中未发现 2 臂间的 sICH 率存在差异。亚组间不存在异质性 ( $\chi^2 = 0.06$ ;  $p = 0.80$ ;  $I^2 = 0\%$ )。

表 e-1 总结了入组研究中介入臂与对照臂的主要并发症。

**讨论** 尽管 IV-tPA 用于治疗 AIS 具有治疗获益, 但用于 LVO 的患者其预后较差。文献中报道的 IV-tPA 血管再通率为 17%~38%<sup>[5,17-19]</sup>。血管再通与良好功能预后具有强相关性。Bhatia 等人<sup>[5]</sup>发现, 血管再通患者较未再通患者的功能独立性率更高 (相对风险 2.5; 95% CI 1.4~4.3) 且死亡率降低。此外, 该项研究还发现, 早期血管再通患者的预后优于晚期再通的患者。鉴于成功及早期的血管再通与良好预后的相关性, 研究人员一直在寻找可以提高血管再通率的其他治疗方法, 近期关于机械取栓的疗效和安全性的研究就是在这样的背景下产生的。

2013 年发表的 3 项早期试验 (IMSIII、SYNTHESIS Expansion、MR RESCUE) 试图比较血管内治疗与药物治疗 AIS 的疗效和安全性<sup>[6-8]</sup>。3 项研究均报道血管内治疗较传统药物治疗缺乏显著差异, 导致人们怀疑血管内卒中治疗的临床获益。然而, 这些早期研究都存在大量局限性, 最显著的问题是未在初始神经影像学资料中进行 LVO 确认并采用的是血管再通率较低的早期血管内装置<sup>[20,21]</sup>。事实上, 在 IMS III 研究中对经 LVO 筛查的患者进行的亚组分析显示血管内治疗近端闭塞的血管其再通率显著较高, 且血管内治疗 ICAT 型或 L 型及 ICA 与 M1 段连续阻塞具有良好的预后趋势<sup>[22,23]</sup>。

早期的 2 项研究 [Trepo 与 Merci 回收器用于治疗急性缺血性卒中血管闭塞的血管切除术血运重建 (TREVO 2) 试验及 SWIFT 试验] 已证实支架回收器的血管再通率显著高于早期 Merci 回收器 (Concentric Medical, Fremont, CA)<sup>[24,25]</sup>。TREVO2 报道使用 TREVO (Stryker Neurovascular, Fremont, CA) 支架回收器再灌注率 (缺血性梗死溶栓治疗评分  $\geq 2$  级) 高于使用 Merci 回收器 (OR 4.22,

**图1** 根据LVO标准分层的AIS患者经血管内vs. 药物治疗治疗后的90天功能独立性 (mRS 0-2)、死亡率 (mRS 6) 和sICH

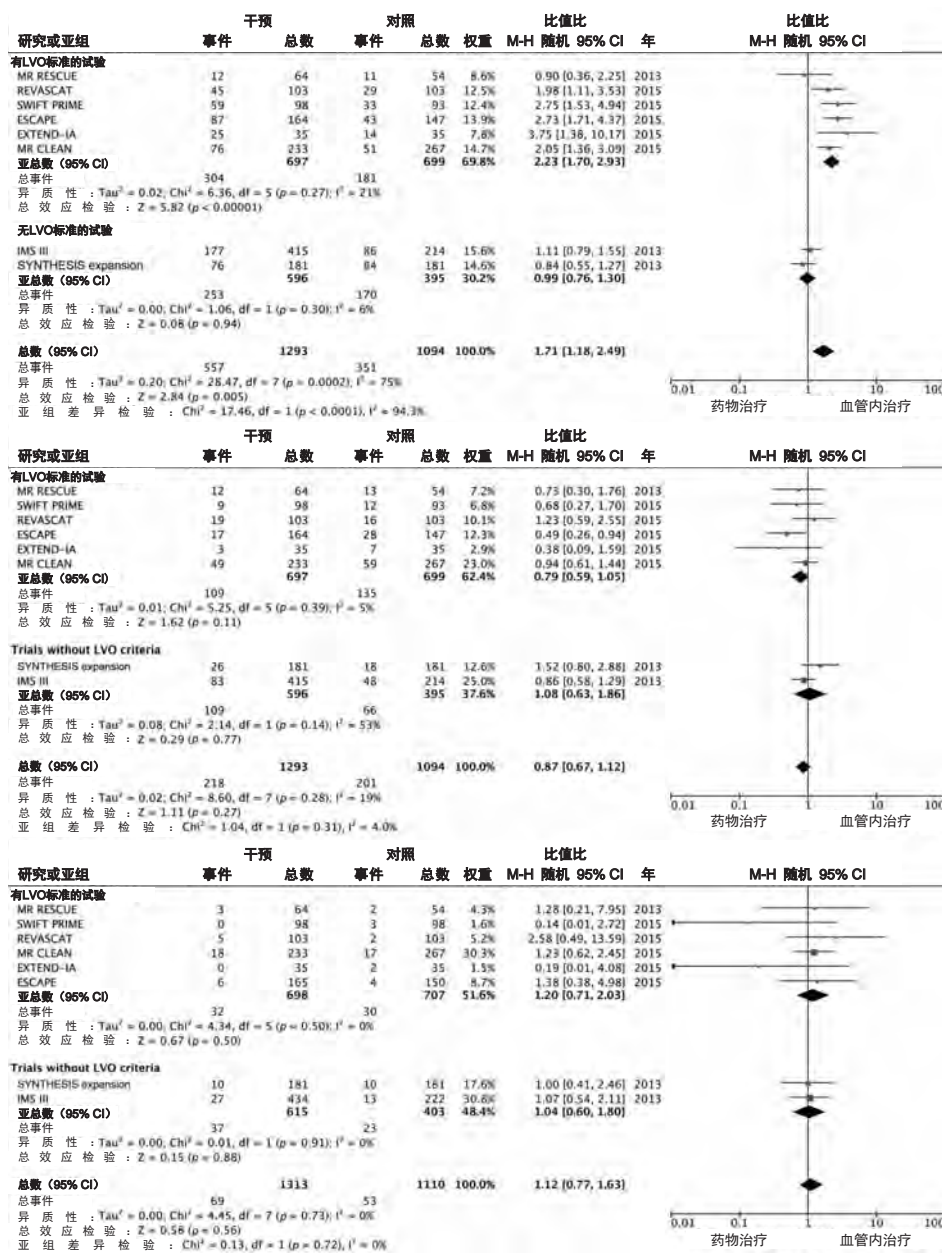

对比血管内治疗与药物治疗急性缺血性卒中 (AIS) 的 (A) 90天功能独立性[改良Rankin量表 (mRS) 0-2]、(B) 90天的死亡率 (mRS 6分)、(C) 症状性颅内出血 (sICH) 的比值比 (OR) 的森林图。入选的研究分为两个亚组: 有大血管闭塞诊断 (LVO) 标准的试验和无LVO标准的试验。估算的OR值及95%可信区间 (CI) 分别以方形和水平线的中点表示。汇总的OR值及95% CI以粗体显示, 并以实心菱形表示。异质性检验和总体疗效列于概括性统计下方。ESCAPE = 充血性心力衰竭及肺动脉导管插入术疗效的评估研究; EXTEND-IA = 延长急性神经功能缺损至动脉内溶栓时间; IMS III = 卒中介入治疗III; M-H = Mantel-Haenszel检验; MR CLEAN = 荷兰血管内治疗急性缺血性卒中的多中心随机临床试验; MR RESCUE = 采用栓子切除术机械性取栓并再通卒中斑块; REVASCAT = 前循环卒中8小时内采用Solitaire装置行血管内运重建vs. 最佳药物治疗; SWIFT PRIME = Solitaire支架血栓切除术作为主要的血管内治疗手; SYNTHESIS = 急性缺血性卒中的局部vs. 全身溶栓治疗。

图2 根据采用支架回收装置分层的AIS患者经血管内vs. 药物治疗治疗后的90天功能独立性 (mRS 0~2)、死亡率 (mRS 6) 和sICH

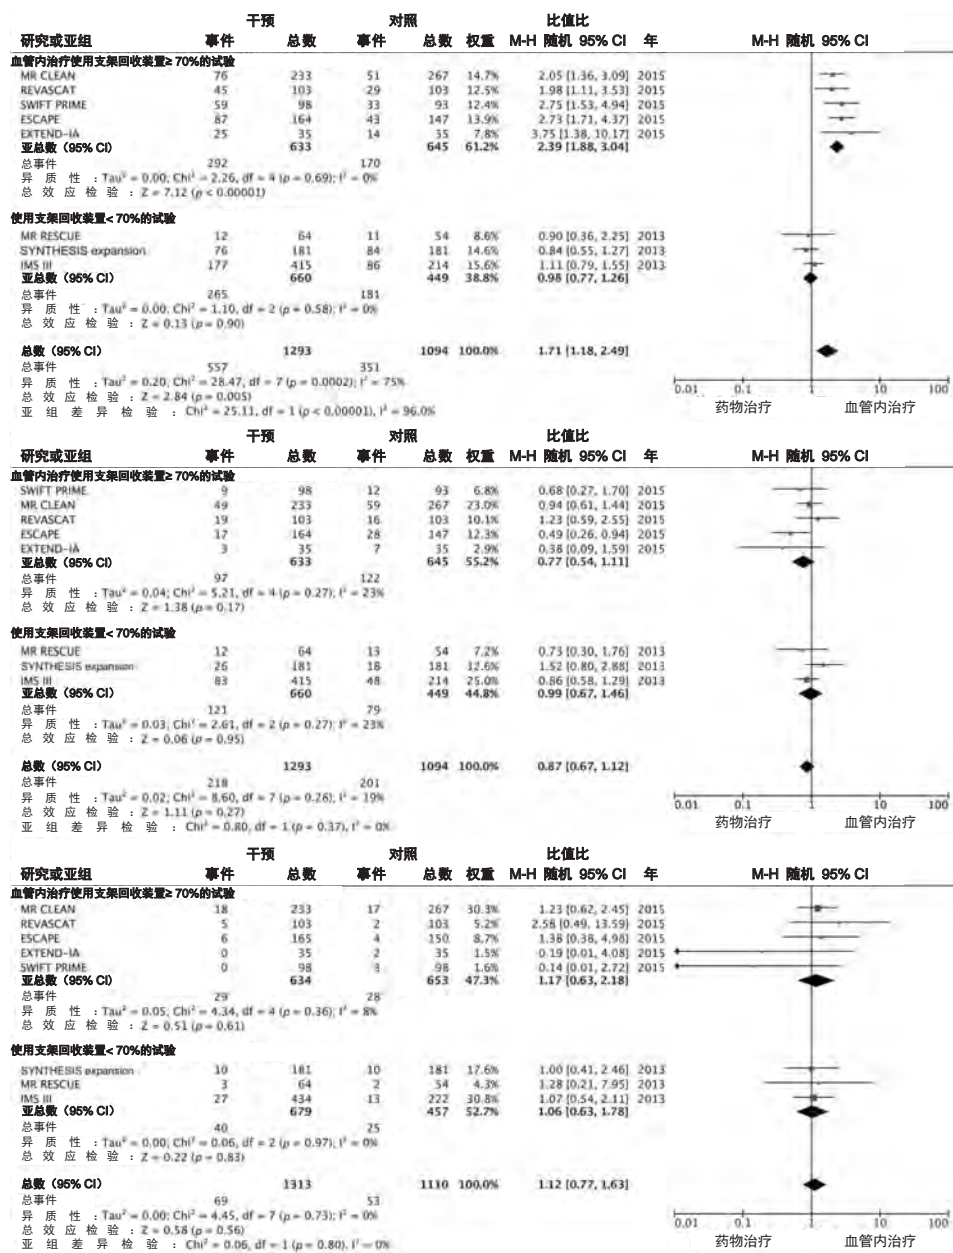

对比血管内治疗与药物治疗急性缺血性卒中 (AIS) 的 (A) 90天功能独立性[改良Rankin量表 (mRS) 0~2]、(B) 90天的死亡率 (mRS 6分)、(C) 症状性颅内出血 (sICH) 的比值比 (OR) 的森林图。纳入的研究分为两个亚组: 血管内治疗使用支架回收装置≥70%的试验和使用支架回收装置<70%的试验; 估算的OR值及95%可信区间 (CI) 分别以方形和水平线的中点表示。汇总的OR值及95% CI以粗体显示, 并以实心菱形表示。异质性检验和总体疗效列于概括性统计下方。ESCAPE = 充血性心力衰竭及肺动脉导管插入术疗效的评估研究; EXTEND-IA = 延长急性神经功能缺损至动脉内溶栓时间; IMS III = 卒中介入治疗III; M-H = Mantel-Haenszel 检验; MR CLEAN = 荷兰血管内治疗急性缺血性卒中的多中心随机临床试验; MR RESCUE = 采用栓子切除术机械性取栓并再通卒中斑块; REVASCAT = 前循环卒中8小时内采用Solitaire装置行血管内运重建vs. 最佳药物治疗; SWIFT PRIME = Solitaire支架血栓切除术作为主要的血管内治疗; SYNTHESIS = 急性缺血性卒中的局部vs. 全身溶栓治疗;



$p < 0.0001$ )<sup>[24]</sup>。同样, SWIFT 试验报道, 使用 Solitaire 血流恢复装置 (ev3 Neurovascular, Irvine, CA) 的患者较使用 Merci 回收器的患者具有较高的再灌注率 (缺血性梗死溶栓治疗评分为 2 或 3 级; OR 4.87,  $p = 0.0001$ )、较高的 3 个月神经功能预后良好率 (OR 2.78,  $p = 0.02$ ) 及较低的 90 天死亡率 (OR 0.34,  $p = 0.02$ )<sup>[25]</sup>。

最近的研究 (MR CLEAN、SWIFT PRIME、EXTEND-IA、ESCAPE、REVASCAT) 克服了早期研究的主要问题, 基于入院时的神经影像学资料筛选具有 LVO 的患者且大多数行血管内治疗的患者采用了支架回收器<sup>[10-14]</sup>。这些研究均显示出在治疗 LVO 引起的 AIS 患者时, 血管内治疗优于药物治疗。对有 LVO 入组标准的试验进行的 meta 分析证实血管内治疗较药物治疗具有较高的功能独立性评分 (OR 2.23; 95% CI 1.70~2.93;  $p < 0.00001$ ), 但死亡率和 sICH 发生率差异无统计学意义。按照主要 ( $\geq 70\%$ ) 使用支架回收器进行分层, 亦显示血管内治疗具有更高的功能独立性评分 (OR 2.39; 95% CI 1.88~3.04;  $p < 0.00001$ )。其他有助于近期研究成功的因素包括使用更加合理的影像学诊断标准, 如 ASPECTS 评分以及在灌注成像中的体积不匹配比值, 以便排除那些梗死核心较大的患者, 这些患者血管再通后并不能显示出临床获益<sup>[11-14]</sup>。尽管纳入的 RCT 研究间存在异质性, 但本 meta 分析仍为急性 LVO 患者进行血管内治疗联合药物治疗 (包括对合适患者 IV-tPA) 提供了强有力的证据。此外, 我们进行的亚组分析还表明通过引入基线神经影像学评估甄别因 LVO 引起的 AIS 患者及在血管内治疗时使用支架回收装置可为血管内卒中治疗带来更多获益。考虑到近期的研究都证实血管内治疗可改善功能预后, 我们假设可能会同时改善死亡率。然而, 除了 ESCAPE 研究外, 其他研究均提示死亡率间无差异<sup>[12]</sup>。

近期的研究也并非无局限性。ESCAPE、EXTEND-IA、SWIFT PRIME 及 REVASCAT 研究均提前终止。EXTEND-IA 和 SWIFT PRIME 研究仅限于症状发作 4.5 小时内符合且接受 IV-tPA 的患者, 而 ESCAPE 研究则发现采用的影像学方案违规。尽管采用盲法进行结果评

估, 但受试者和治疗团队并未使用盲法, 因此可能导致实施偏倚。另外, 血管内治疗尚不能广泛用于所以 AIS 患者的治疗; 这些研究中经筛选后的患者仅占 AIS 患者中的小部分。在 EXTEND-IA 研究中, 7,798 例患者中仅 70 例 (0.9%) 通过筛选最终入组, 在 SWIFT PRIME 研究中, 1,470 例患者中仅 196 例 (13%) 通过筛选并接受随机分配<sup>[11,14]</sup>。

本 meta 分析的局限性在于汇总数据来自各项 RCT 研究, 因此也承袭了这些 RCT 研究的所有局限性和缺陷。这些研究中的临床与影像学评估方法的多样性仍难以克服。此外, 并非每个研究臂中的患者接受相同的治疗方案。特别是, 并非介入臂中的所有患者都接受了机械性取栓术、采用同样的取栓装置或接受 IA/IV-tPA 治疗, 且并非对照臂中所有患者都接受 IV-tPA。同时也应当注意到, 未对这些研究中的不同支架回收器或影像学筛选标准进行直接对比, 因此不能将本研究的结果推广至这些研究中未使用的支架回收器中。血管内治疗的研究均针对前循环 LVO 的 AIS 患者, 因此也不能将此结果推广至后循环 (即椎基底动脉系统) 的 LVO。

从研究调查者的角度对个体患者层面进行进一步的亚组分析将有助于指导老年 ( $> 80$  岁) AIS 患者及重度卒中患者 (NIHSS 评分  $> 20$  分)。目前的文献资料表明, 局部麻醉下进行血管内治疗的预后优于全身麻醉, 但需进一步的研究来证实<sup>[26,27]</sup>。为快速识别急性 LVO、排除大梗死灶患者以及为尽可能在最早的时间进行血管内取栓术应适时转诊经筛选的 AIS 患者至血管造影室, 应优化急救医疗服务、急诊室、影像学、卒中神经病学及神经介入医师的工作流程及协作能力。针对卒中医疗体系方面的政策及方案应进行适当的合并, 以便将筛选后的 AIS 患者快速分诊至有能力提供血管内治疗的设施前。

对比较血管内治疗与药物治疗 AIS 的现代多中心、前瞻性 RCT 研究的 meta 分析证实较高的 90 天功能独立性评分支持血管内治疗, 而死亡率和 sICH 方面无差异。初始神经影像学资料中有 LVO 表现并采用支架回收装置进行血管内机械性取栓术的患者, 亦证实其 90 天的功能独立性评分高于药物治疗。本项

*meta* 分析为血管内治疗联合药物治疗（包括对符合的患者给予 IV-tPA 治疗）提供了强有力的证据，是经适当筛选的急性缺血性卒中及 LVO 患者的标准治疗方案。

### 作者贡献

Dr. Chen: study concept and design, acquisition of data, data analysis and interpretation, critical revision of the manuscript for important intellectual content. Dr. Ding: study concept and design, data interpretation, critical revision of the manuscript for important intellectual content. Dr. Starke: study concept and design, data interpretation, critical revision of the manuscript for important intellectual content. Dr. Mehndiratta: data interpretation, critical revision of the manuscript for important intellectual content. Dr. Crowley: data interpretation, critical revision of the manuscript for important intellectual content. Dr. Liu: data interpretation, critical revision of the manuscript for important intellectual content. Dr. Southerland: data interpretation, critical revision of the manuscript for important intellectual content, study supervision. Dr. Worrall: data interpretation, critical revision of the manuscript for important intellectual content, study supervision.

### 研究资金

No targeted funding reported.

### 声明

C. Chen, D. Ding, R. Starke, P. Mehndiratta, R. Crowley, and K. Liu report no disclosures relevant to the manuscript. A. Southerland reports personal fees from Neurology Podcast, personal fees from Expert Legal Review, grants from American Heart Association–American Stroke Association, and grants from American Academy of Neurology, grants from American Board of Psychiatry and Neurology, outside the submitted work. In addition, Dr. Southerland has a patent Provisional Patent Application Serial Number 61/867,477, entitled “Method, System and Computer Readable Medium for Improving Treatment Times for Rapid Evaluation of Acute Stroke via Mobile Telemedicine” pending. B. Worrall serves as associate editor of *Neurology*<sup>®</sup>. Go to Neurology.org for full disclosures.

Received May 26, 2015. Accepted in final form August 5, 2015.

### 参考文献

1. Mozaffarian D, Benjamin EJ, Go AS, et al. Heart disease and stroke statistics: 2015 update: a report from the American Heart Association. *Circulation* 2015;131:e29–322.
2. Smith WS, Lev MH, English JD, et al. Significance of large vessel intracranial occlusion causing acute ischemic stroke and TIA. *Stroke* 2009;40:3834–3840.
3. The National Institute of Neurological Disorders and Stroke rt-PA Stroke Study Group. Tissue plasminogen activator for acute ischemic stroke. *N Engl J Med* 1995;333:1581–1587.
4. Hacke W, Kaste M, Bluhmki E, et al. Thrombolysis with alteplase 3 to 4.5 hours after acute ischemic stroke. *N Engl J Med* 2008;359:1317–1329.
5. Bhatia R, Hill MD, Shobha N, et al. Low rates of acute recanalization with intravenous recombinant tissue plasminogen activator in ischemic stroke: real-world experience and a call for action. *Stroke* 2010;41:2254–2258.
6. Broderick JP, Palesch YY, Demchuk AM, et al. Endovascular therapy after intravenous t-PA versus t-PA alone for stroke. *N Engl J Med* 2013;368:893–903.

7. Kidwell CS, Jahan R, Gornbein J, et al. A trial of imaging selection and endovascular treatment for ischemic stroke. *N Engl J Med* 2013;368:914–923.
8. Ciccone A, Valvassori L, Nichelatti M, et al. Endovascular treatment for acute ischemic stroke. *N Engl J Med* 2013;368:904–913.
9. Przybylowski CJ, Ding D, Starke RM, Durst CR, Crowley RW, Liu KC. Evolution of endovascular mechanical thrombectomy for acute ischemic stroke. *World J Clin Cases* 2014;2:614–622.
10. Berkhemer OA, Fransen PS, Beumer D, et al. A randomized trial of intraarterial treatment for acute ischemic stroke. *N Engl J Med* 2015;372:11–20.
11. Campbell BC, Mitchell PJ, Kleinig TJ, et al. Endovascular therapy for ischemic stroke with perfusion-imaging selection. *N Engl J Med* 2015;372:1009–1018.
12. Goyal M, Demchuk AM, Menon BK, et al. Randomized assessment of rapid endovascular treatment of ischemic stroke. *N Engl J Med* 2015;372:1019–1030.
13. Jovin TG, Chamorro A, Cobo E, et al. Thrombectomy within 8 hours after symptom onset in ischemic stroke. *N Engl J Med* 2015;372:2296–2306.
14. Saver JL, Goyal M, Bonafe A, et al. Stent-retriever thrombectomy after intravenous t-PA vs. t-PA alone in stroke. *N Engl J Med* 2015;372:2285–2295.
15. Barber PA, Demchuk AM, Zhang J, Buchan AM. Validity and reliability of a quantitative computed tomography score in predicting outcome of hyperacute stroke before thrombolytic therapy: ASPECTS Study Group: Alberta Stroke Programme Early CT Score. *Lancet* 2000;355:1670–1674.
16. Higgins JPT, Green S. *Cochrane Handbook for Systematic Reviews of Interventions* Version 5.1.0 [online]. Available at: <http://www.cochrane-handbook.org>. Accessed May 2, 2015.
17. Alexandrov AV, Molina CA, Grotta JC, et al. Ultrasound-enhanced systemic thrombolysis for acute ischemic stroke. *N Engl J Med* 2004;351:2170–2178.
18. del Zoppo GJ, Poeck K, Pessin MS, et al. Recombinant tissue plasminogen activator in acute thrombotic and embolic stroke. *Ann Neurol* 1992;32:78–86.
19. Ribo M, Alvarez-Sabin J, Montaner J, et al. Temporal profile of recanalization after intravenous tissue plasminogen activator: selecting patients for rescue reperfusion techniques. *Stroke* 2006;37:1000–1004.
20. Mocco J, Fiorella D, Fargen KM, et al. Endovascular therapy for acute ischemic stroke is indicated and evidence based: a position statement. *J Neurointerv Surg* 2015;7:79–81.
21. Khalessi AA, Fargen KM, Lavine S, Mocco J. Commentary: Societal statement on recent acute stroke intervention trials: results and implications. *Neurosurgery* 2013;73:E375–E379.
22. Demchuk AM, Goyal M, Yeatts SD, et al. Recanalization and clinical outcome of occlusion sites at baseline CT angiography in the Interventional Management of Stroke III TRIAL. *Radiology* 2014;273:202–210.
23. Broderick JP, Palesch YY, Demchuk AM, et al. Evolution of practice during the Interventional Management of Stroke III Trial and implications for ongoing trials. *Stroke* 2014;45:3606–3611.
24. Nogueira RG, Lutsep HL, Gupta R, et al. Trevo versus Merci Retrievers for Thrombectomy Revascularisation of Large Vessel Occlusions in Acute Ischaemic Stroke (TREVO 2): a randomised trial. *Lancet* 2012;380:1231–1240.
25. Saver JL, Jahan R, Levy EI, et al. Solitaire flow restoration device versus the Merci Retriever in patients with acute ischaemic stroke (SWIFT): a randomised, parallel-group, non-inferiority trial. *Lancet* 2012;380:1241–1249.

26. van den Berg LA, Koelman DL, Berkhemer OA, et al. Type of anesthesia and differences in clinical outcome after intra-arterial treatment for ischemic stroke. *Stroke* 2015; 46:1257-1262.
27. Schonberger S, Mohlenbruch M, Pfaff J, et al. Sedation vs. intubation for endovascular stroke treatment (SIESTA): a randomized monocentric trial. *Int J Stroke Epub* 2015 Apr 12.

(陈康宁 审校)
